# Supplementary material
Source: HighWire-hosted journal article supplement (https://cmajopen.ca/highwire/filestream/89368/field_highwire_adjunct_files/2/open-2021-0320-2-at.pdf)
Supplement: open-2021-0320-2-at.pdf [file open-2021-0320-2-at.pdf]

Supplementary Table 2: Logistic regression models assessing the association between sociodemographic characteristics and unmet healthcare needs during the COVID-19 pandemic as reported by participants during the CLSA COVID-19 exit survey (Sept. to Dec. 2020), adjusted for all covariates

|                          | Any challenges in accessing healthcare<br><b>aOR (95% CI)</b> | Did not go to the hospital or to see a doctor even though they needed to<br><b>aOR (95% CI)</b> | Experienced barriers to accessing testing for COVID-19<br><b>aOR (95% CI)</b> |
|--------------------------|---------------------------------------------------------------|-------------------------------------------------------------------------------------------------|-------------------------------------------------------------------------------|
| <b>Sex</b>               |                                                               |                                                                                                 |                                                                               |
| Male                     | Reference                                                     | Reference                                                                                       | Reference                                                                     |
| Female                   | 1.03 (0.96, 1.10)                                             | 1.13 (1.01, 1.25)                                                                               | 0.89 (0.77, 1.03)                                                             |
| <b>Age</b>               |                                                               |                                                                                                 |                                                                               |
| 50-54                    | Reference                                                     | Reference                                                                                       | Reference                                                                     |
| 55-64                    | 0.86 (0.74, 1.00)                                             | 0.74 (0.59, 0.92)                                                                               | 0.74 (0.56, 0.99)                                                             |
| 65-74                    | 0.85 (0.72, 0.99)                                             | 0.62 (0.48, 0.78)                                                                               | 0.66 (0.48, 0.89)                                                             |
| 75-84                    | 0.69 (0.58, 0.82)                                             | 0.45 (0.35, 0.59)                                                                               | 0.50 (0.35, 0.70)                                                             |
| 85-96                    | 0.52 (0.42, 0.64)                                             | 0.39 (0.28, 0.54)                                                                               | 0.40 (0.25, 0.64)                                                             |
| <b>Region</b>            |                                                               |                                                                                                 |                                                                               |
| Atlantic                 | Reference                                                     | Reference                                                                                       | Reference                                                                     |
| Quebec                   | 0.47 (0.42, 0.53)                                             | 1.43 (1.22, 1.68)                                                                               | 0.68 (0.49, 0.95)                                                             |
| Ontario                  | 1.19 (1.09, 1.31)                                             | 1.00 (0.85, 1.18)                                                                               | 3.30 (2.57, 4.22)                                                             |
| Prairies                 | 0.72 (0.65, 0.79)                                             | 0.78 (0.65, 0.93)                                                                               | 1.84 (1.41, 2.40)                                                             |
| British Columbia         | 0.98 (0.89, 1.08)                                             | 0.90 (0.76, 1.07)                                                                               | 2.19 (1.69, 2.85)                                                             |
| <b>Urban/Rural</b>       |                                                               |                                                                                                 |                                                                               |
| Urban                    | Reference                                                     | Reference                                                                                       | Reference                                                                     |
| Rural                    | 0.94 (0.87, 1.03)                                             | 1.04 (0.91, 1.20)                                                                               | 0.93 (0.76, 1.13)                                                             |
| <b>Racial background</b> |                                                               |                                                                                                 |                                                                               |
| White                    | Reference                                                     | Reference                                                                                       | Reference                                                                     |
| Non-white                | 0.74 (0.60, 0.90)                                             | 1.09 (0.81, 1.46)                                                                               | 0.91 (0.61, 1.38)                                                             |
| <b>Immigrant status</b>  |                                                               |                                                                                                 |                                                                               |
| Non-immigrant            | Reference                                                     | Reference                                                                                       | Reference                                                                     |

|                                                     |                   |                   |                   |
|-----------------------------------------------------|-------------------|-------------------|-------------------|
| Immigrant                                           | 1.12 (1.03, 1.22) | 1.37 (1.19, 1.58) | 0.98 (0.81, 1.19) |
| <b>Household income</b>                             |                   |                   |                   |
| Less than \$20,000                                  | 0.93 (0.76, 1.14) | 1.16 (0.86, 1.57) | 0.95 (0.62, 1.46) |
| \$20,000 to <\$50,000                               | 0.93 (0.82, 1.04) | 1.10 (0.91, 1.34) | 0.84 (0.65, 1.08) |
| \$50,000 to <\$100,000                              | 0.98 (0.89, 1.08) | 1.02 (0.87, 1.20) | 0.72 (0.59, 0.89) |
| \$100,000 to <\$150,000                             | 1.05 (0.95, 1.16) | 1.04 (0.87, 1.24) | 0.76 (0.62, 0.94) |
| \$150,000 or more                                   | Reference         | Reference         | Reference         |
| <b>Education</b>                                    |                   |                   |                   |
| Less than secondary school                          | 0.72 (0.60, 0.86) | 1.05 (0.81, 1.35) | 0.67 (0.43, 1.06) |
| Secondary school                                    | 0.77 (0.69, 0.86) | 0.95 (0.80, 1.14) | 0.51 (0.37, 0.70) |
| Some post-secondary                                 | 0.96 (0.86, 1.09) | 1.09 (0.89, 1.32) | 0.85 (0.65, 1.11) |
| Post-secondary diploma or more                      | Reference         | Reference         | Reference         |
| <b>Marital status</b>                               |                   |                   |                   |
| Married or living with a partner                    | Reference         | Reference         | Reference         |
| Single, never married or never lived with a partner | 1.15 (1.02, 1.30) | 0.94 (0.77, 1.14) | 1.21 (0.92, 1.58) |
| Widowed                                             | 0.94 (0.83, 1.07) | 1.09 (0.90, 1.33) | 1.02 (0.75, 1.37) |
| Divorced or separated                               | 1.12 (1.00, 1.25) | 1.17 (0.99, 1.38) | 1.20 (0.95, 1.52) |
| <b>Chronic conditions</b>                           |                   |                   |                   |
| Absent                                              | Reference         | Reference         | Reference         |
| Present                                             | 1.46 (1.36, 1.56) | 1.53 (1.37, 1.71) | 1.11 (0.96, 1.28) |
| <b>Dwelling type</b>                                |                   |                   |                   |
| House                                               | Reference         | Reference         | Reference         |
| Apartment                                           | 0.96 (0.88, 1.05) | 1.04 (0.91, 1.20) | 1.15 (0.95, 1.40) |
| Other                                               | 0.98 (0.81, 1.19) | 1.14 (0.86, 1.51) | 1.00 (0.63, 1.60) |
| <b>Work status</b>                                  |                   |                   |                   |
| Do not work outside the home                        | Reference         | Reference         | Reference         |
| Usually work outside the home                       | 0.97 (0.89, 1.05) | 0.92 (0.80, 1.05) | 1.09 (0.92, 1.30) |
| <b>Unmet needs (pre-pandemic)</b>                   |                   |                   |                   |
| Yes                                                 | 2.23 (2.00, 2.47) | 2.55 (2.21, 2.94) | 1.70 (1.37, 2.12) |
| No                                                  | Reference         | Reference         | Reference         |

Appendix 2, as supplied by the authors. Appendix to: Khattar J, Anderson LN, De Rubeis V, et al. Unmet health care needs during the COVID-19 pandemic among adults: a prospective cohort study in the Canadian Longitudinal Study on Aging. *CMAJ Open* 2023. doi:10.9778/cmajo.2021-0320. Copyright © 2023 The Author(s) or their employer(s). To receive this resource in an accessible format, please contact us at [cmajgroup@cmaj.ca](mailto:cmajgroup@cmaj.ca).

Appendix 2, as supplied by the authors. Appendix to: Khattar J, Anderson LN, De Rubeis V, et al. Unmet health care needs during the COVID-19 pandemic among adults: a prospective cohort study in the Canadian Longitudinal Study on Aging. *CMAJ Open* 2023. doi:10.9778/cmajo.2021-0320. Copyright © 2023 The Author(s) or their employer(s). To receive this resource in an accessible format, please contact us at [cmajgroup@cmaj.ca](mailto:cmajgroup@cmaj.ca).
